# Supplementary material for: Case Article—Bayer New Drug Development Decision Making
Source: Atypon-hosted journal article supplement (doi:10.1287/ited.2021.0262ca), 2021-11-03
Supplement: ited.2021.0262ca.sm1.xlsx [file ited.2021.0262ca.sm1.xlsx]

## Sheet: Input
A	B	C	D	E	F	G	H	I
Description	Units	Variable Name	In Use	Name of Switch	Index
Strategic Option		Strategy	Develop	StrategySW	2	Not Develop	Develop
Description	Units	Variable Name	In Use	Name of Switch	Index	Low	Base	High
Costs
Capital investment for facility	$ million	Facility	0	FacilitySW	2
Cost of goods (COGs)	$ per treatment/dose	COGS	0	COGSSW	2
Product Launch Date
BAY 57-9602 year of launch in the USA, CND, EU, and JPN		Launch	0	LaunchSW	2
Market
Acute Peripheral Arterial Occlusion (PAO) in the USA	number of patients	PAOUSA	0	PAOUSASW	2
Acute Peripheral Arterial Occlusion (PAO) in Canada (CND)	% of USA PAO	PAOCND	0	PAOCNDSW	2
Acute Peripheral Arterial Occlusion (PAO) in Europe (EU)	% of USA PAO	PAOEU	0	PAOEUSW	2
Acute Peripheral Arterial Occlusion (PAO) in Japan (JPN)	% of USA PAO	PAOJPN	0	PAOJPNSW	2
Compound annual growth rate (CAGR) of PAO	%	PAOCAGR	0	PAOCAGRSW	2
Initial thrombolytic drug class share in the USA	%	ClassShareInitialUSA	0	ClassShareInitialUSASW	2
Initial thrombolytic drug class share in the CND	%	ClassShareInitialCND	0	ClassShareInitialCNDSW	2
Initial thrombolytic drug class share in the EU	%	ClassShareInitialEU	0	ClassShareInitialEUSW	2
Initial thrombolytic drug class share in the JPN		ClassShareInitialJPN	0	ClassShareInitialJPNSW	2
Thrombolytic peak drug class share in the USA	%	PeakClassShareUSA	0	PeakClassShareUSASW	2
Thrombolytic peak drug class share in CND	%	PeakClassShareCND	0	PeakClassShareCNDSW	2
Thrombolytic peak drug class share in EU	%	PeakClassShareEU	0	PeakClassShareEUSW	2
Thrombolytic peak drug class share in JPN	%	PeakClassShareJPN	0	PeakClassShareJPNSW	2
Number of years to reach peak	number of years	RampUp	0	RampUpSW	2
Peak product share of BAY 57-9602 in the USA	%	PeakProductShareUSA	0	PeakProductShareUSASW	2
Peak product share of BAY 57-9602 in CND	%	PeakProductShareCND	0	PeakProductShareCNDSW	2
Peak product share of BAY 57-9602 in EU	%	PeakProductShareEU	0	PeakProductShareEUSW	2
Peak product share of BAY 57-9602 in JPN	%	PeakProductShareJPN	0	PeakProductShareJPNSW	2
Price in the USA at launch	$ per treatment/dose	PriceUSA	0	PriceUSASW	2
Price in CND at launch	$ per treatment/dose	PriceCND	0	PriceCNDSW	2
Price in EU at launch	$ per treatment/dose	PriceEU	0	PriceEUSW	2
Price in JPN at launch	$ per treatment/dose	PriceJPN	0	PriceJPNSW	2
Compound annual growth rate (CAGR) of price	%	PriceCAGR	0	PriceCAGRSW	2
Me-too competitor launch year (L+1, L+3, L+4)	year	MeTooLaunch	0	MeTooLaunchSW	2
Me-Too competitor impact (% loss of BAY 57-9602)	%	MeTooImpact	0	MeTooImpactSW	2
Orphan drug status success		OrphanSuccess	success	OrphanSuccessSW	2	fail	success
Me-too competitor impact post-orphan (% loss of BAY 57-9602)	%	MeTooPostOrphanImpact	0	MeTooPostOrphanImpactSW	2
Orphan market exclusivity in USA	years	OrphanMktExclusivityUSA	0	OrphanMktExclusivityUSASW	2
Orphan market exclusivity in EU	years	OrphanMktExclusivityEU	0	OrphanMktExclusivityEUSW	2
Recombinant competitor probability of success		RecombinantSuccess	success	RecombinantSuccessSW	2	fail	success
Recombinant competitor launch year (L+4, L+6, L+8)	year	RecombinantLaunch	0	RecombinantLaunchSW	2
Recombinant competitor impact (% loss of BAY 57-9602)	%	RecombinantImpact	0	RecombinantImpactSW	2
Global Variables
Discount Rate	%	Discount	0	DiscountSW	2
Tax Rate	%	Tax	0	TaxSW	2

## Sheet: Cost Input
Launch	2020	2021	2022	2023	2024	2025	2026	2027	2028	2029	2030	2031	2032	2033	2034	2035	2036	2037	2038	2039	2040	2041	2042	2043	2044	2045
Enter 10 percentile value for Launch year																											RDcostArray
Enter 50 percentile value for Launch year
Enter 90 percentile value for Launch year
Launch	2020	2021	2022	2023	2024	2025	2026	2027	2028	2029	2030	2031	2032	2033	2034	2035	2036	2037	2038	2039	2040	2041	2042	2043	2044	2045
Enter 10 percentile value for Launch year																											MKTcostArray
Enter 50 percentile value for Launch year
Enter 90 percentile value for Launch year

## Sheet: Output
A	B	C	D	E	F	G	H	I	J	K	L	M	N	O	P	Q	R	S	T	U	V	W	X	Y	Z	AA
Strategy: Develop
CALCULATIONS
	2020	2021	2022	2023	2024	2025	2026	2027	2028	2029	2030	2031	2032	2033	2034	2035	2036	2037	2038	2039	2040	2041	2042	2043	2044	2045	Year
Number of PAO patients
USA market
CND market
EU market
JPN market
Thrombolytic drug class share
USA market
CND market
EU market
JPN market
Number of PAO patients treated with a thrombolytic drug
USA market
CND market
EU market
JPN market
Product share of BAY 57-9602 in the Thrombolytic Drug Class	2020	2021	2022	2023	2024	2025	2026	2027	2028	2029	2030	2031	2032	2033	2034	2035	2036	2037	2038	2039	2040	2041	2042	2043	2044	2045
USA market
CND market
EU market
JPN market
Me-Too competitor impact to the market share of BAY 57-9602
Without Orphan drug status
With Orphan drug status (USA)
With Orphan drug status (EU)
Recombinant competitor impact to the market share of BAY 57-9602
Me-Too and Recombinant Competitors' impact to the market share of BAY 57-9602
USA market
CND market
EU market
JPN market
Note: 100% indicates no loss of share
Market share of BAY 57-9602 with competitive impacts	2020	2021	2022	2023	2024	2025	2026	2027	2028	2029	2030	2031	2032	2033	2034	2035	2036	2037	2038	2039	2040	2041	2042	2043	2044	2045
USA market
CND market
EU market
JPN market
Number of treatments sold of BAY 57-9602
USA market
CND market
EU market
JPN market
Pricing of BAY 57-9602 ($ per treatment)
USA market
CND market
EU market
JPN market
FINANCIAL RESULTS ($million)
	2020	2021	2022	2023	2024	2025	2026	2027	2028	2029	2030	2031	2032	2033	2034	2035	2036	2037	2038	2039	2040	2041	2042	2043	2044	2045
Revenue
Production Cost
Gross Margin
Marketing Expenses
R&D Expenses
EBIT
Tax
Earnings
New Plant Investment
Cash Flow
NPV ($million)
NPV
